# Supplementary material
Source: PubMed Central journal article supplement (PMC3996692)
Supplement: ismej2013214x16.pdf [file ismej2013214x16.pdf]

**Table S2.** Fragment recruitment results for selected virus genomes used as references against sorted metagenomes G4000-40002. Highlighted values in gray represent results plotted in Figure 4. Avg., average.

| Genome name                                           | GenBank         | Length (bp)   | G4000         |                         | G4001         |             | G4002         |             |
|-------------------------------------------------------|-----------------|---------------|---------------|-------------------------|---------------|-------------|---------------|-------------|
|                                                       |                 |               | Avg. coverage | % coverage <sup>a</sup> | Avg. coverage | % coverage  | Avg. coverage | % coverage  |
| <i>Acanthamoeba polyphaga</i> mimivirus isolate M4    | JN036606        | 981813        | 0.02          | 0.8                     | 0.11          | 2.8         | 0.47          | 6.3         |
| <i>Cafeteria roenbergensis</i> virus BV-PW1           | GU244497        | 617453        | 0.03          | 1.1                     | 0.15          | 3.7         | 0.81          | 11.0        |
| <b><i>Phaeocystis globosa</i> virus 14T</b>           | <b>HQ634144</b> | <b>452892</b> | <b>0.04</b>   | <b>1.3</b>              | <b>0.22</b>   | <b>5.5</b>  | <b>2.56</b>   | <b>32.9</b> |
| <i>Emiliana huxleyi</i> virus 208                     | JF974318        | 411003        | 0.03          | 0.8                     | 0.12          | 2.8         | 0.46          | 4.9         |
| <i>Emiliana huxleyi</i> virus 202                     | HQ634145        | 407516        | 0.03          | 0.6                     | 0.11          | 2.7         | 0.47          | 4.8         |
| Organic Lake phycodnavirus 1                          | HQ704802        | 344723*       | 0.03          | 1.4                     | 0.23          | 5.7         | 2.52          | 30.7        |
| <i>Paramecium bursaria</i> Chlorella virus 1 (PBCV-1) | JF411744        | 330611        | 0.07          | 2.2                     | 0.39          | 7.7         | 0.55          | 9.0         |
| Organic Lake phycodnavirus 2                          | HQ704803        | 282077*       | 0.05          | 1.8                     | 0.31          | 7.7         | 2.98          | 35.3        |
| <b>Pelagibacter phage HTVC008M</b>                    | <b>KC465899</b> | <b>147284</b> | <b>1.56</b>   | <b>35.8</b>             | <b>3.19</b>   | <b>50.4</b> | <b>0.41</b>   | <b>13.4</b> |
| Pelagibacter phage HTVC019P                           | KC465901        | 42084         | 1.27          | 16.4                    | 2.18          | 12.8        | 0.43          | 9.0         |
| Pelagibacter phage HTVC010P                           | KC465898        | 34892         | 1.01          | 14.6                    | 0.31          | 7.5         | 0.31          | 9.2         |
| Pelagibacter phage HTVC011P                           | KC465900        | 39921         | 0.29          | 9.0                     | 0.20          | 9.7         | 0.10          | 3.5         |
| <i>Prochlorococcus</i> phage P-SSM2                   | GU071092        | 252401        | 0.64          | 14.3                    | 1.53          | 22.5        | 0.26          | 7.6         |
| Puniceispirillum phage HMO-2011                       | GU557055        | 55282         | 10.30         | 28.6                    | 0.59          | 16.5        | 0.32          | 7.9         |
| <b><i>Ostreococcus lucimarinus</i> virus OIV4</b>     | <b>JF974316</b> | <b>216925</b> | <b>0.16</b>   | <b>3.3</b>              | <b>2.24</b>   | <b>45.6</b> | <b>0.97</b>   | <b>12.7</b> |
| <i>Micromonas pusilla</i> virus PL1                   | HQ633072        | 197060        | 0.16          | 3.3                     | 2.72          | 57.1        | 1.25          | 16.7        |
| <i>Ostreococcus tauri</i> virus 2                     | FN600414        | 184409        | 0.18          | 3.7                     | 2.75          | 55.1        | 1.25          | 16.1        |
| <i>Synechococcus</i> cyanophage syn9                  | DQ149023        | 177300        | 0.71          | 16.9                    | 1.72          | 23.5        | 0.21          | 6.5         |
| <i>Aeromonas</i> phage phiAS4                         | HM452125        | 163875        | 0.44          | 9.1                     | 1.13          | 12.7        | 0.17          | 4.7         |
| Cyanophage PSS2                                       | GU071090        | 107530        | 0.10          | 2.4                     | 0.09          | 2.1         | 0.07          | 1.6         |
| <i>Prochlorococcus</i> phage P-SSP7                   | GU071093        | 45176         | 0.05          | 2.3                     | 0.06          | 2.0         | 0.05          | 1.9         |

<sup>a</sup>The percentage of the genome covered at  $\geq 1x$ ; \*incomplete genome.
